# Supplementary material for: Robust normalization protocols for multiplexed fluorescence bioimage analysis
Source: PubMed Central journal article supplement (PMC4779207; doi:10.1186/s13040-016-0088-2), 2016-03-05
Supplement: 13040_2016_88_MOESM1_ESM.pdf [file 13040_2016_88_MOESM1_ESM.pdf]

## Appendix

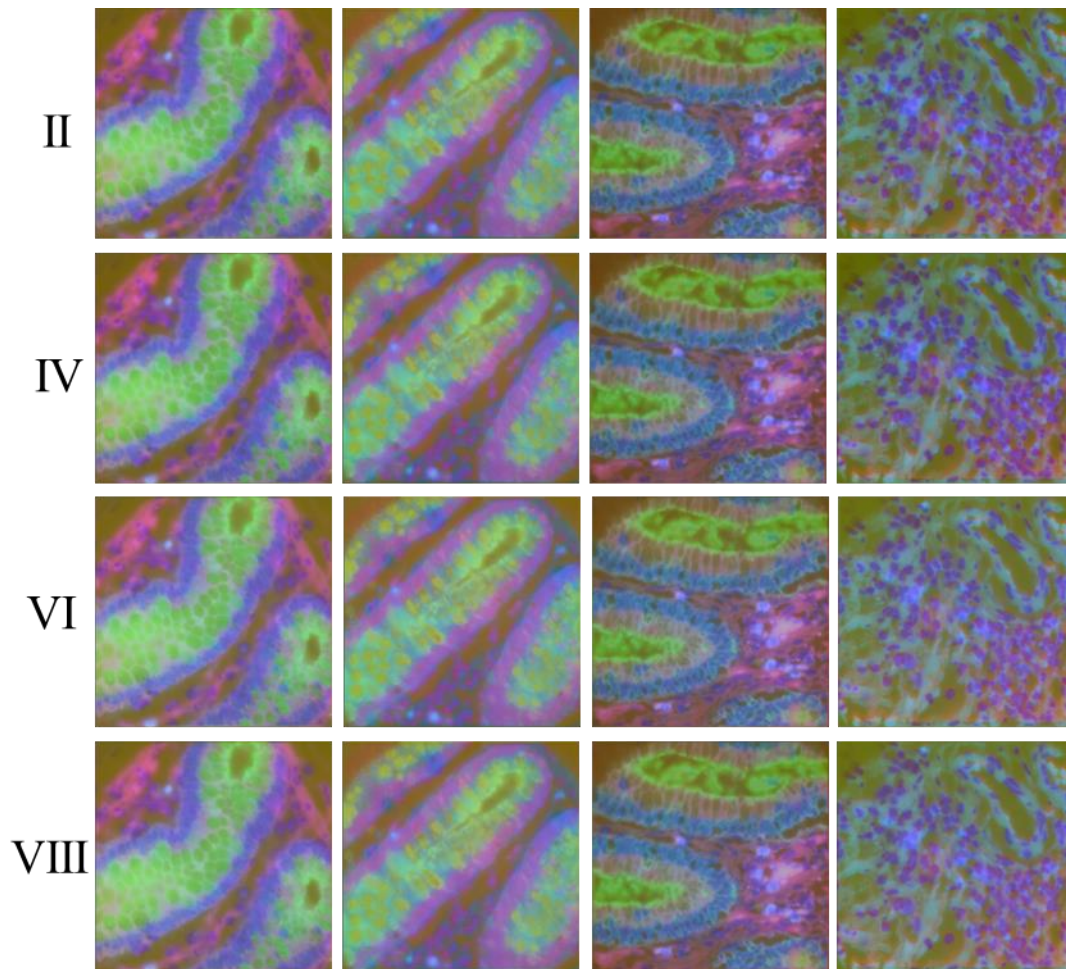

**Figure A- 1: Column 1 to 4 represent four different cases: first two columns are from histologically normal tissue and the last two are from cancerous tissue of the same patient. Rows 1 to 4 represent pseudo-color images obtained after applying low rank normalization protocols as marked by the experts.**

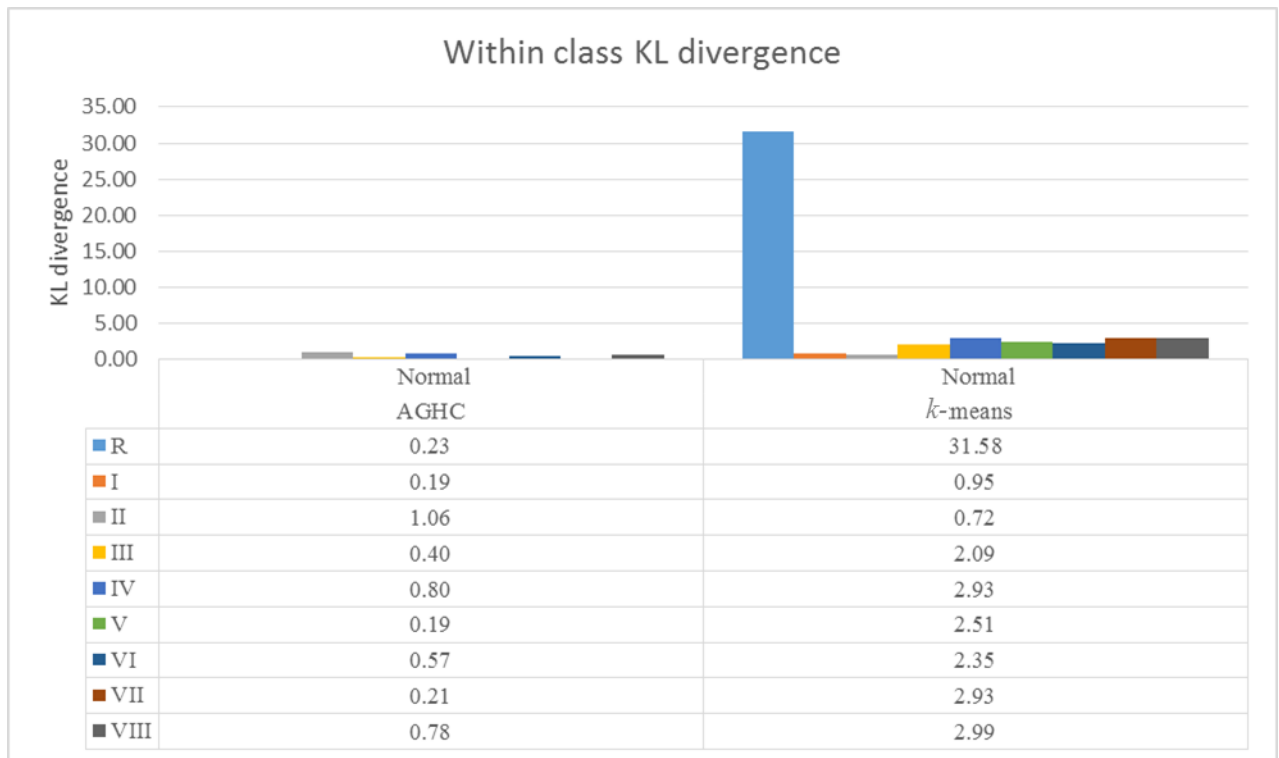

**Figure A- 2: Within class KL-divergence for Patient 2.** Within class KL-divergence for second patient after performing phenotyping using different normalization protocols.

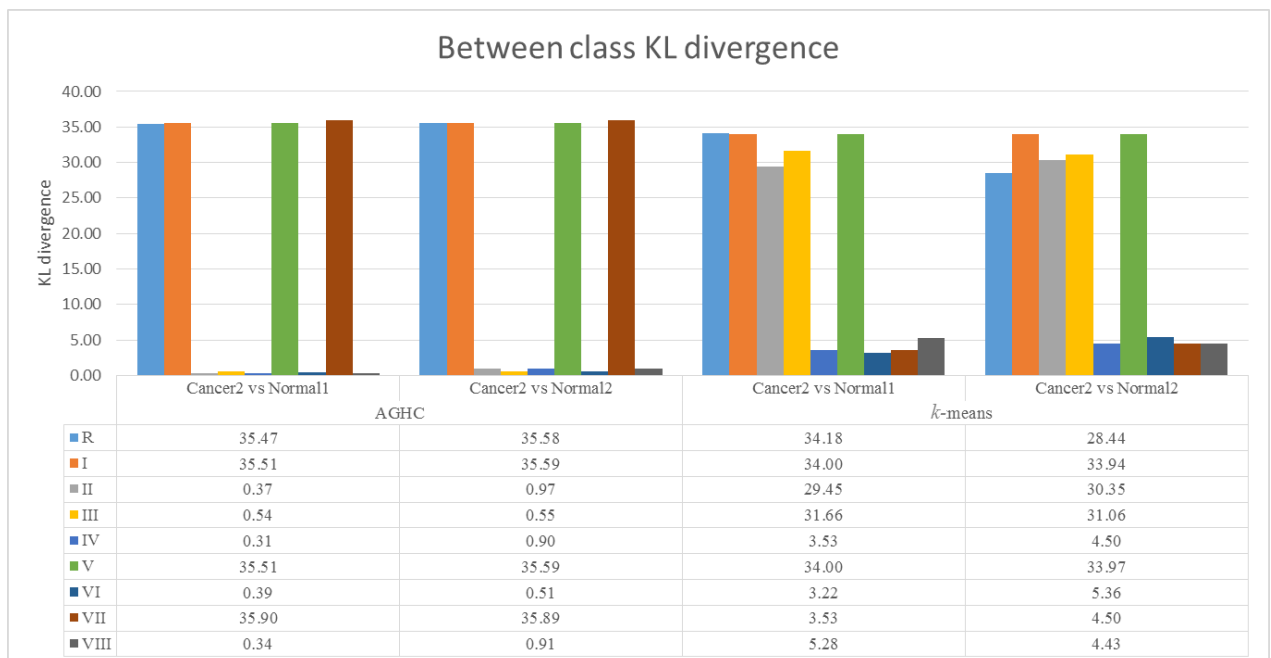

**Figure A- 3: Between class KL-divergence for Patient 2.** Between class KL-divergence for second patient after performing phenotyping using different normalization protocols.
